# Supplementary material for: In Silico Characterization of Mate Genes in Wheat
Source: Research Square preprint supplement (doi:10.21203/rs.3.rs-354858/v1), 2021-03-24
Supplement: Supplementary file 1 [file faa48434dd26e085691a4f8b.docx]

**Protein Motifs**

**Family no.1**

**Family no.2**

**Family no. 3**

**Family no. 4**

**Family no. 5**

**Family no. 6**

**Family no. 7**
